1 **Istradefylline, an adenosine A2a receptor antagonist, ameliorates neutrophilic airway**  
2 **inflammation and psoriasis in mice.**

3

4 **Running title: Adenosine A2a receptor antagonist ameliorates neutrophilic**  
5 **inflammation**

6

7 Mieko Tokano<sup>a,b</sup>, Masaaki Kawano<sup>a</sup>, Rie Takagi<sup>a</sup>, and Sho Matsushita<sup>a, c\*</sup>

8 <sup>a</sup> Departments of Allergy and Immunology, Faculty of Medicine, Saitama Medical University,  
9 38 Morohongo, Moroyama, Saitama 350-0495, Japan

10 <sup>b</sup> Department of Neurology, Saitama Medical University, 38 Morohongo, Moroyama,  
11 Saitama, 350-0495, Japan

12 <sup>c</sup> Allergy Center, Saitama Medical University, 38 Morohongo, Moroyama, Saitama 350-0495,  
13 Japan

14

15 \*Correspondence: Sho Matsushita, M.D., Ph.D.

16 Department of Allergy and Immunology, Faculty of Medicine, Saitama Medical University,  
17 38 Morohongo, Moroyama, Saitama 350-0495, Japan

18 Tel: +81-49-276-1172; Fax: +81-49-294-2274; E-mail: [shomat@saitama-med.ac.jp](mailto:shomat@saitama-med.ac.jp)

19

20

21

22 **Abstract**

23 **Objective:** Extracellular adenosine is produced from secreted ATP by cluster of differentiation  
24 (CD)39 and CD73. Both are critical nucleotide metabolizing enzymes of the adenosine  
25 generating pathway and are secreted by neuronal or immune cells. Adenosine plays a role in  
26 energy processes, neurotransmission, and endogenous regulation of inflammatory responses.

27 Istradefylline is a selective adenosine A2a receptor (A2aR) antagonist used for the treatment  
28 of Parkinson's disease. We have reported that adenosine primes hypersecretion of interleukin  
29 (IL)-17A via A2aR. Istradefylline, as well as an inhibitor of CD39 (ARL67156) and an  
30 inhibitor of CD73 (AMP-CP), suppressed IL-17A production, and the administration of  
31 istradefylline to mice with experimental autoimmune encephalomyelitis (EAE) led to the  
32 marked amelioration of the disease. These previous results suggest that adenosine is an  
33 endogenous modulator of neutrophilic inflammation. We investigated the effect of  
34 istradefylline, ARL67156 and AMP-CP on other mouse models of neutrophilic inflammation.

35 **Methods:** We tested the effect of istradefylline, ARL67156 and AMP-CP on OVA-induced  
36 neutrophilic airway inflammation or imiquimod (IMQ)-induced psoriasis in mice. These two  
37 model mice received these drugs orally or percutaneously, respectively. The production of  
38 IL-17A in the lung and ear thickness were used as an index of the effects.

39 **Results:** We show that istradefylline, ARL67156 and AMP-CP suppressed the OVA-induced  
40 IL-17A production in the lung and imiquimod-induced psoriasis.

41 **Conclusion:** These results indicate that adenosine-mediated IL-17A production plays a role  
42 in neutrophilic inflammation models, and moreover, istradefylline, ARL67156, and AMP-CP  
43 are effective in animal models of neutrophilic inflammation. Some clinical relevancies in  
44 COVID-19 are discussed. (248 words)

45

46 **Keywords:** Adenosine A2a receptor, Neutrophilic inflammatory response, Psoriasis, Severe

47 acute respiratory syndrome coronavirus 2, Th17 cells

48

## 49 **Introduction**

50 Adenosine, a molecular moiety of ATP, ADP, and AMP, is involved in energy  
51 processes and is essential for the phenomena of life. Extracellular adenosine is produced from  
52 secreted ATP by ectonucleotidases, such as the E-NTPDase cluster of differentiation (CD)39,  
53 which converts ATP or ADP to ADP or AMP, respectively, and the 5'-nucleotidase CD73,  
54 which dephosphorylates AMP to adenosine. CD39 and CD73 are expressed on the surface of  
55 endothelial cells<sup>1,2)</sup> and immune cells<sup>3-5)</sup>. Adenosine binds to adenosine receptors expressed  
56 on the cell surface. There are four subtypes of adenosine receptors, A1, A2a, A2b, and A3,  
57 which belong to a superfamily of membrane proteins called the G protein-coupled receptor  
58 family. A2aR and A2bR signal the Gs protein to trigger cAMP synthesis. On the other hand,  
59 A1R and A3R signal the Gi protein to trigger cAMP degradation<sup>6)</sup>. A1R, A2bR and A3R are  
60 widely expressed in the body. In contrast, A2aR is expressed at high levels in only a few  
61 regions of the body, namely the striatum, olfactory tubercle, nucleus accumbens, endothelial  
62 cells, vascular smooth muscle cells, platelets, and immune cells<sup>7)</sup>. A1R and A2aR are  
63 high-affinity receptors, whereas A2bR and A3R are low-affinity receptors<sup>8,9)</sup>.

64 The purine nucleoside adenosine also plays a role as a neurotransmitter, primarily  
65 in the striatum, olfactory tubercle and nucleus accumbens<sup>10)</sup>. Istradefylline is a selective  
66 A2aR antagonist used for the treatment of Parkinson's disease<sup>11)</sup>. Furthermore, adenosine is a  
67 potent endogenous regulator of inflammation and immune reactions<sup>6)</sup>. However, the  
68 molecular mechanisms underlying its effects are largely unknown. In previous a study,  
69 adenosine was reported to induce T-helper (Th)17 differentiation by activating A2bR<sup>12)</sup>.

70 Th17 cells are a subset of T-helper cells that differentiate from naïve CD4<sup>+</sup> T cells  
71 in the presence of tumor growth factor (TGF)- $\beta$  and interleukin (IL)-6. These cytokines are  
72 secreted by antigen-presenting cells in response to stimulation via T cell receptor (TCR)  
73 antigen<sup>13-15)</sup>. IL-17A production by Th17 cells drives neutrophil recruitment and neutrophilic

74 inflammation<sup>16,17</sup>). The IL-17A-mediated responses are induced in receptor-expressing cells,  
75 such as endothelial cells, epithelial cells, and fibroblasts<sup>18</sup>). Neutrophilic inflammation is  
76 associated with many diseases<sup>19</sup>), including autoimmune diseases<sup>20-23</sup>), neutrophilic airway  
77 inflammation<sup>24,25</sup>), psoriasis<sup>26,27</sup>), severe atopic dermatitis<sup>28</sup>), and multiple sclerosis<sup>29-34</sup>). There  
78 are currently no specific therapies that use low-molecular weight chemicals for neutrophilic  
79 inflammation, nevertheless corticosteroids are a specific therapy for eosinophilic  
80 inflammation. However, recent studies by ourselves and others suggested that dopamine  
81 D1-like receptor antagonists and dopamine D2-like receptor agonists suppress neutrophilic  
82 inflammation by suppressing Th17 differentiation and activation<sup>35-37</sup>). We recently reported  
83 that adenosine is also produced by activated CD4<sup>+</sup> T cells, mainly during T cell-APC  
84 interactions, primes the hypersecretion of IL-17A by CD4<sup>+</sup> T cells, where A2aR plays a role  
85 in the hypersecretion of IL-17A. Istradefylline, an inhibitor of CD39 (ARL67156), and an  
86 inhibitor of CD73 (AMP-CP) suppressed IL-17A production, and the administration of  
87 istradefylline to mice with experimental autoimmune encephalomyelitis led to the marked  
88 amelioration of symptoms<sup>38</sup>). These results suggest that adenosine is an endogenous  
89 modulator of neutrophilic inflammation.

90           In this study, we tested the effect of istradefylline, ARL67156, and AMP-CP on  
91 other models of neutrophilic inflammation, such as OVA-induced neutrophilic airway  
92 inflammation and imiquimod-induced psoriasis. We show that istradefylline, ARL67156 and  
93 AMP-CP are effective in animal models of neutrophilic inflammation.

94

95

96 **Materials and methods**

97 *Mice*

98 OVA TCR-transgenic DO11.10 mice were obtained from The Jackson Laboratory  
99 (Bar Harbor, ME). C57BL/6 mice were obtained from Japan SLC (Shizuoka, Japan). Mice  
100 were housed in appropriate animal care facilities at Saitama Medical University and handled  
101 according to the international guidelines for experiments with animals. All experiments were  
102 approved by the Animal Research Committee of Saitama Medical University.

103

104 *Measurement of cytokine concentrations in the lung*

105 Airway inflammation was induced as described previously<sup>36</sup>. Briefly,  
106 eight-week-old female DO11.10 mice received a subcutaneous inguinal injection (100  
107 µg/mouse) of 2 mg/mL OVA (Sigma) in PBS (-) emulsified in complete Freund's adjuvant  
108 (CFA) containing mycobacterium tuberculosis H37Ra (100 µg/mouse; Difco) on day -8.  
109 Mice also received oral PBS (-), an A2aR antagonist (Istradefylline) (6 µg/mouse), an  
110 inhibitor of CD39 (ARL67156, Tocris) (0.5 mg/mouse) or an inhibitor of CD73 inhibitor  
111 (adenosine 5'-( $\alpha$ ,  $\beta$ -methylene) diphosphate (AMP-CP; Tocris) (0.5 mg/mouse) on days -10,  
112 -8, -6, -4, -2, and -1. Mice were challenged with an aerosolized solution of 3% OVA or PBS  
113 (-) for 10 min on day -1. The mice were analyzed on day 0. Lung cells were prepared as  
114 previously described<sup>36</sup>. Briefly, the left lungs were cut out, homogenized, and incubated in  
115 10 mL of DMEM medium containing 10% FCS, 100 U/mL penicillin, 100 µg/mL  
116 streptomycin, 1 mM sodium pyruvate, 50 µM 2-mercaptoethanol, 50 µg/mL gentamycin, 1  
117 µg/mL amphotericin, and collagenase from clostridium histolyticum (Sigma-Aldrich) for one  
118 hour. Following incubation, the lung lymphocytes were washed twice. Lung lymphocytes ( $1$   
119  $\times 10^6$ ) were seeded in a round-bottomed 96-well plate and then incubated in in 500 µL of  
120 DMEM medium containing 10% FCS, 100 U/mL penicillin, 100 µg/mL streptomycin, 1 mM

121 sodium pyruvate, 50  $\mu$ M 2-mercaptoethanol, 50  $\mu$ g/mL gentamycin, and 1  $\mu$ g/mL  
122 amphotericin for four days. The supernatant was then collected for the IL-17A, IFN- $\gamma$ , and  
123 IL-5 ELISAs.

124

#### 125 *Histological examination*

126 The histological examination was performed as previously reported<sup>36</sup>. The right  
127 lungs were resected, fixed with 10% neutralized buffered formalin (Wako), and embedded in  
128 paraffin. Three-micrometer-thick sections were stained with hematoxylin and eosin.

129

#### 130 *The mouse model of imiquimod (IMQ)-induced psoriasis*

131 Psoriasis was induced in the mouse model as previously described<sup>39</sup>. Briefly,  
132 C57BL/6 mice were treated with either IMQ cream containing 5% IMQ (Mochida  
133 Pharmaceutical) or sham cream, which was applied on the ears for 5 consecutive days. On  
134 day 9, the ear thickness ( $\mu$ m) was measured. In the treatment groups, a cream containing 5%  
135 A2aR antagonist (Istradefylline), liquid containing 10 mM CD39 inhibitor (ARL67156), or  
136 liquid containing 10 mM CD73 inhibitor (AMP-CP) was used.

137

#### 138 *Cytokine ELISAs*

139 The concentrations of IFN- $\gamma$ , IL-5, and IL-17A in cell supernatants were measured  
140 using specific ELISA kits (DuoSet Kit, R&D). Any value below the lower limit of detection  
141 (15.6 pg/mL) was set to 0. No cytokine cross-reactivity was observed within the detection  
142 ranges of the kits. If necessary, samples were diluted appropriately so that the measurements  
143 fell within the appropriate detection range for each cytokine.

144

#### 145 *Statistical analysis*

146 Differences between two groups were analyzed using an unpaired Student's *t*-test.  
147 Differences between three or more groups were analyzed using a one-way ANOVA with  
148 Tukey's post-hoc test. Clinical scores were analyzed using a non-parametric Mann-Whitney  
149 U-test. All calculations were performed using KaleidaGraph software program (Synergy  
150 software, Reading, PA, USA). P values of <0.05 were considered to indicate statistical  
151 significance.

152

## 153 **Results**

154 *An adenosine A2a receptor antagonist, istradefylline, suppresses OVA-induced neutrophilic*  
155 *airway inflammation in DO11.10 mice*

156 First, we tested the effect of an adenosine A2a receptor antagonist, istradefylline,  
157 on OVA-induced neutrophilic airway inflammation in OVA TCR-transgenic DO11.10 mice.  
158 DO11.10 mice were challenged with nebulized OVA or with PBS as a control. The  
159 administration of istradefylline was performed starting from 10 days before nebulization  
160 (Fig.1A). Our previous study showed a clear correlation between IL-17A in the lung and  
161 neutrophilic airway inflammation<sup>36</sup>. Indeed, the concentration of IL-17A increased in the  
162 lungs of OVA-challenged DO11.10 mice, which were suppressed by istradefylline (Fig.1B).  
163 Time course studies showed that the production of IL-17A was time-dependent (Fig.1C). We  
164 observed that istradefylline treatment suppressed IL-17A (a Th17-related cytokine) and IFN- $\gamma$   
165 (a Th1-related cytokine) secretion on day 4 and had no significant effect on IL-5 (a  
166 Th2-related cytokine) secretion (Fig.1D).

167

168 *Istradefylline suppresses OVA-induced neutrophil infiltration in DO11.10 mice*

169 The histology of OVA-challenged DO11.10 mice showed prominent neutrophil  
170 infiltration into the peribronchial area (Fig. 2A), while the infiltration declined in mice that



171 received istradefylline (Fig. 2B). Accordingly, istradefyllin-treatment suppressed neutrophilic  
172 airway inflammation.

173

174 *ARL67156 and AMP-CP also suppress OVA-induced neutrophilic airway inflammation in*  
175 *DO11.10 mice*

176           Since we found that istradefylline suppressed the production of IL-17A in the lung,  
177 we next examined the effect of a CD39 inhibitor (ARL67156) and a CD73 inhibitor  
178 (AMP-CP) on OVA-induced neutrophilic airway inflammation. ARL67156 and AMP-CP  
179 inhibit the production of adenosine (data not shown). DO11.10 mice were challenged with  
180 nebulized OVA, and the administration of ARL67156 and AMP-CP was performed from 10  
181 days before OVA nebulization. As in the case of istradefylline treatment, ARL67156 and  
182 AMP-CP treatment suppressed the production of IL-17A in the lung (Fig.3A, B). This  
183 suggests that adenosine promotes neutrophilic airway inflammation by hypersecretion of  
184 IL-17A.

185

186 *Istradefylline, ARL67156, and AMP-CP suppress imiquimod (IMQ)-induced psoriasis in mice*

187           Psoriasis is a Th17-mediated disease<sup>26,27</sup>. Indeed, the skin infiltration of neutrophils,  
188 activated monocytes, Th17 cells are observed in psoriasis and a mouse model of  
189 IMQ-induced psoriasis<sup>40-42</sup>. Mice were treated with either 5% IMQ cream or sham cream. In  
190 the treatment groups, 5% istradefylline-containing cream, 10 mM ARL67156 or 10 mM  
191 AMP-CP-containing liquid was used. Istradefylline, ARL67156, and AMP-CP significantly  
192 suppressed the effect of IMQ (Fig. 4A, B, C). All these observations collectively suggest that  
193 the oral or transdermal administration of istradefylline, ARL67156, and AMP-CP suppresses  
194 Th17-mediated disease.

195

196 **Discussion**

197 Atopic asthma is usually triggered by allergens or by antigen-non-specific stimuli,  
198 in which Th2 inflammation, group 2 innate lymphoid cell (ILC2) activation and eosinophilic  
199 inflammation play a pivotal role. Approximately 50% of elderly and 90% of young  
200 individuals with asthma show the atopic phenotype. On the other hand, the recruitment and  
201 activation of neutrophils in airways are associated with resistance to corticosteroids.  
202 Approximately 40% of elderly patients with asthma have neutrophilic airway  
203 inflammation<sup>24,25,43,44</sup>, accompanying increased bronchial IL-17<sup>+</sup> cells<sup>45-47</sup>. The  
204 TCR-transgenic DO11.10 mice have TCR, which specifically recognizes MHC class II-OVA  
205 peptide complex. OVA nebulization alone could induce IL-17-dependent neutrophilic airway  
206 inflammation<sup>28,36,48-50</sup>. This response is OVA-specific, as other antigens could not induce  
207 neutrophilic airway inflammation. In addition, deletion of the IL-17 gene suppressed the  
208 neutrophilic airway inflammation<sup>50</sup>. Thus, this animal model is similar to the pathogenesis of  
209 antigen-induced Th17-mediated neutrophilic airway inflammation<sup>36</sup>. Our studies demonstrate  
210 that istradefyllin-treatment suppressed IL-17-dependent neutrophilic airway inflammation in  
211 DO11.10 mice. Similarly, ARL67156 and AMP-CP, which inhibit the production of  
212 adenosine, suppressed IL-17-dependent neutrophilic airway inflammation, which  
213 corroborates our previous findings<sup>38</sup>. Furthermore, the modulation of signaling via A2aR  
214 might ameliorate autoimmune diseases, including allergy and infections. The latter may  
215 include disseminated intravascular coagulation (DIC) or acute respiratory distress syndrome  
216 (ARDS) in SARS-CoV-2 disease (COVID-19), which is reportedly associated with  
217 neutrophil extracellular traps (NETs)<sup>51-54</sup>. In recent previous studies, patients with severe  
218 COVID-19 showed the aberrant activation of neutrophils and Th17 promotion<sup>55</sup>, and IL-17  
219 can serve as a biomarker of the severity of COVID-19<sup>56</sup>. Indeed, autopsy samples from the  
220 lungs of COVID-19 patients showed neutrophil infiltration in pulmonary capillaries<sup>57</sup>, and

221 the peripheral blood of patients showed an increased frequency of Th17 cells<sup>58</sup>). Accordingly,  
222 it is conceivable that istradefyllin-treatment may suppress IL-17 secretion and neutrophilic  
223 airway inflammation in COVID-19.

224 Psoriasis had long been characterized as a Th1-mediated disease because psoriatic  
225 lesions showed the elevated mRNA expression of Th1 cytokines (IFN- $\gamma$  and TNF- $\alpha$ )<sup>59</sup>.  
226 Recent studies have shown that the pathology of psoriasis is strongly dependent on IL-17A<sup>60</sup>.  
227 In an IMQ-induced mouse model, activated Th17 cells and marked skin infiltration of  
228 neutrophils are observed<sup>40,42</sup>. Our studies demonstrate that istradefylline, ARL67156, and  
229 AMP-CP suppress IMQ-induced murine psoriasis. It is therefore conceivable that adenosine  
230 promotes IL-17A production in an IMQ -induced mouse model. We also confirmed that  $\gamma\delta$ T  
231 cells secreted IL-17A after stimulation with agonistic anti-CD3/CD28 antibodies in the  
232 presence of adenosine (data not shown). In the dermis with psoriasis, IL-23 from  
233 keratinocytes, activated Langerhans cells, macrophages, and dendritic cells are capable of  
234 promoting the production of IL-17A by  $\gamma\delta$ T cells<sup>61-63</sup>. Adenosine-mediated IL-17A  
235 production may play an important role in psoriasis.

236 Our study demonstrated that istradefyllin as well as ARL67156 and AMP-CP  
237 suppress neutrophilic airway inflammation and psoriasis in mice, which strongly attests to the  
238 *in vivo* relevance of adenosine-mediated IL-17A production. It is also suggested that  
239 istradefylline as well as ARL67156 and AMP-CP may be effective treatments for  
240 Th17-mediated diseases, such as psoriasis, neutrophilic bronchial asthma, and autoimmune  
241 diseases, due to their suppression of the hypersecretion of IL-17A from Th17 cells. Some  
242 researchers argue that an A2aR agonist, CGS21680, suppresses Th17 differentiation<sup>64-66</sup>.  
243 Because CGS21680 is much less selective than the A2aR agonist we used in a recent  
244 previous study (PSB0777)<sup>38</sup>, it is highly conceivable that these studies gave contradictory  
245 results.

246 It is suggested that the concentrations of adenosine are increased as much as 50  
247 times by physiological stimuli such as hypoxia, hypoglycemia, and ischemia<sup>67</sup>). A previous  
248 study also suggested that extracellular adenosine is transported into the cell by transporters or  
249 that it is rapidly broken down by adenosine deaminase or adenosine kinase<sup>68</sup>). It is probable  
250 that adenosine induces neutrophilic inflammation in acute stages (*i.e.*, in the innate  
251 immunity-acquired immunity interface).

252

### 253 **Conflict of Interest**

254 Sho Matsushita is an employee of iMmno, Inc.

255 The other authors declare no conflicts of interest in association with the present study.

256

### 257 **Acknowledgments**

258 This work was supported by a Grant-in-Aid for Scientific Research (C) (no. 19K07201),  
259 awarded to M.K., a Grant-in-Aid for Young Scientists (B) (no. 18K15327) to R.T., and a  
260 Grant-in-Aid for Scientific Research (C) (no. 19K08887) awarded to S.M. by the Japanese  
261 Society for the Promotion of Science. This work was also supported by the 44th and 45th  
262 Science Research Promotion Fund, awarded to M.K. by the Promotion and Mutual Aid  
263 Corporation for Private Schools of Japan.

264

### 265 **Abbreviations**

266 Th, T-helper; CD, cluster of differentiation; TGF, tumor growth factor; IL, interleukin; APCs,  
267 antigen presenting cells; EAE, experimental autoimmune encephalomyelitis; CFA, complete  
268 Freund's adjuvant; OVA, ovalbumin; IMQ, imiquimod; Ab, antibody; n, number of repeat  
269 experiments; SD, standard deviation.

270

271 **Author contributions**

272 M.T., R.T., M.K., and S.M., performed the experiments. M.T., M.K., and S.M., conceived and  
273 designed the experiments. M.T., M.K., and S.M., wrote the manuscript. All authors discussed  
274 the results and commented on the manuscript.

275

276 **References**

277

278 1) Kaczmarek, E., K. Koziak, J. Sevigny, J. B. Siegel, J. Anrather, A. R. Beaudoin, F. H.  
279 Bach, and S. C. Robson. 1996. Identification and characterization of CD39/vascular ATP  
280 diphosphohydrolase. *J Biol Chem* 271: 33116-33122.

281 2) Jalkanen, S., and M. Salmi. 2008. VAP-1 and CD73, endothelial cell surface enzymes in  
282 leukocyte extravasation. *Arteriosclerosis, thrombosis, and vascular biology* 28: 18-26.

283 3) Junger, W. G. 2011. Immune cell regulation by autocrine purinergic signalling. *Nat Rev*  
284 *Immunol* 11: 201-212.

285 4) Whiteside, T. L., M. Mandapathil, and P. Schuler. 2011. The role of the adenosinergic  
286 pathway in immunosuppression mediated by human regulatory T cells (Treg). *Curr Med*  
287 *Chem* 18: 5217-5223.

288 5) Allard, B., M. S. Longhi, S. C. Robson, and J. Stagg. 2017. The ectonucleotidases CD39  
289 and CD73: Novel checkpoint inhibitor targets. *Immunol Rev* 276: 121-144.

290 6) Cronstein, B. N., and M. Sitkovsky. 2017. Adenosine and adenosine receptors in the  
291 pathogenesis and treatment of rheumatic diseases. *Nat Rev Rheumatol* 13:41-51.

292 7) Ciruela, F., C. Albergaria, A. Soriano, L. Cuffí, L. Carbonell, S. Sánchez, J. Gandía, and V.  
293 Fernández-Dueñas. 2010. Adenosine receptors interacting proteins (ARIPs): Behind the  
294 biology of adenosine signaling. *Biochim Biophys Acta* 1798:9-20.

295 8) Fredholm, B.B., G. Arslan, L. Halldner, B. Kull, G. Schulte, and W. Wasserman.  
296 2000. Structure and function of adenosine receptors and their genes.

- 297 *Naunyn-Schmiedeberg's Arch. Pharmacol* 362, 364-374.
- 298 9) Livingston, M., L.G.Heaney, and M.Ennis. 2004. Adenosine, inflammation and asthma--a  
299 review. *Inflamm Res* 53:171-178.
- 300 10) Mori, A., and T. Shindou. 2003. Modulation of GABAergic transmission in the  
301 striatopallidal system by adenosine A2A receptors: a potential mechanism for the  
302 antiparkinsonian effects of A2A antagonists. 2003. *Neurology* 61 (11 Suppl 6):S44-48.
- 303 11) Takahashi, M., M. Fujita, N. Asai, M. Saki, amd A. Mori. 2018.Safety and effectiveness  
304 of istradefylline in patients with Parkinson's disease: interim analysis of a post-marketing  
305 surveillance study in Japan. *Expert Opin Pharmacother* 19:1635-1642.
- 306 12) Wilson, J. M., C. C. Kurtz, S. G. Black, W. G. Ross, M. S. Alam, J. Linden, and P. B.  
307 Ernst. 2011. The A2B adenosine receptor promotes Th17 differentiation via stimulation of  
308 dendritic cell IL-6. *J Immunol* 186: 6746-6752.
- 309 13) Matsuzaki, G., and M. Umemura. 2007. Interleukin-17 as an effector molecule of innate  
310 and acquired immunity against infections. *Microbiol Immunol* 51: 1139-1147.
- 311 14) Manel, N., D. Unutmaz, and D. R. Littman. 2008. The differentiation of human T(H)-17  
312 cells requires transforming growth factor-beta and induction of the nuclear receptor  
313 RORgammat. *Nat Immunol* 9: 641-649.
- 314 15) Ivanov, II, L. Zhou, and D. R. Littman. 2007. Transcriptional regulation of Th17 cell  
315 differentiation. *Semin Immunol* 19: 409-417.
- 316 16) Aggarwal, S., and A.L. Gurney. 2002. IL-17: prototype member of an emerging cytokine  
317 family. *J Leukoc Biol* 71:1-8.
- 318 17) Kolls J.K., and A. Linden. 2004. Interleukin-17 family members and inflammation.  
319 *Immunity* 21: 467-476.
- 320 18) Ouyang, W., J.K. Kolls, and Y Zheng. 2008. The biological functions of T helper 17 cell  
321 effector cytokines in inflammation. *Immunity* 28:454-467.

- 322 19) Tesmer, L. A., S. K. Lundy, S. Sarkar, and D. A. Fox. 2008. Th17 cells in human disease.  
323 *Immunol Rev* 223: 87-113.
- 324 20) Ogura, H., M. Murakami, Y. Okuyama, M. Tsuruoka, C. Kitabayashi, M. Kanamoto, M.  
325 Nishihara, Y. Iwakura, and T. Hirano. 2008. Interleukin-17 promotes autoimmunity by  
326 triggering a positive-feedback loop via interleukin-6 induction. *Immunity* 29, 628-636.
- 327 21) Leng, R.X., G.M. Chen, H.F. Pan, and D.Q. Ye. 2010. The role of IL-23/IL-17 axis in the  
328 etiopathogenesis of Behçet's disease. *Clin Rheumatol* 29, 1209.
- 329 22) Arayssi, T., and A. Hamdan. 2004. New insights into the pathogenesis and therapy of  
330 Behçet's disease. *Curr Opin Pharmacol* 4:183-188.
- 331 23) Hirota, K., M. Hashimoto, H. Yoshitomi, S. Tanaka, T. Nomura, T. Yamaguchi, Y.  
332 Iwakura, N. Sakaguchi, and S. Sakaguchi. 2007. T cell self-reactivity forms a cytokine  
333 milieu for spontaneous development of IL-17+ Th cells that cause autoimmune arthritis. *J*  
334 *Exp Med* 204, 41-47.
- 335 24) McKinley L., J. F. Alcorn, A. Peterson, R. B. Dupont, S. Kapadia, A. Logar, A. Henry, C.  
336 G. Irvin, J. D. Piganelli, A. Ray, J. K. Kolls. 2008. TH17 cells mediate steroid-resistant  
337 airway inflammation and airway hyperresponsiveness in mice. *J. Immunol.* 181:  
338 4089-4097.
- 339 25) Lindén A. 2001. Role of interleukin-17 and the neutrophil in asthma. *Int. Arch. Allergy*  
340 *Immunol.* 126: 179-184.
- 341 26) Rizzo, H.L., S. Kagami, K.G. Phillips, S.E. Kurtz, S.L. Jacques, and A. Blauvelt. 2011.  
342 IL-23-mediated psoriasis-like epidermal hyperplasia is dependent on IL-17A. *J Immunol*  
343 186, 1495-1502.
- 344 27) Cai, Y., X. Shen, C. Ding, C. Qi, K. Li, X. Li, V. R. Jala, H. Zhang, T. Wang, J. Zheng, and  
345 J. Yan. 2011. Pivotal role of dermal IL-17-producing gammadelta T cells in skin  
346 inflammation. *Immunity* 35, 596-610.

- 347 28) Nakae, S. Y. Komiyama, A. Nambu, K. Sudo, M. Iwase, I. Homma, K. Sekikawa, M.  
348 Asano, and Y. Iwakura. 2002. Antigen-specific T cell sensitization is impaired in  
349 IL-17-deficient mice, causing suppression of allergic cellular and humoral responses.  
350 *Immunity* 17, 375-387.
- 351 29) Komiyama, Y. S. Nakae, T. Matsuki, A. Nambu, H. Ishigame, S. Kakuta, K. Sudo, Y.  
352 Iwakura. 2006. IL-17 plays an important role in the development of experimental  
353 autoimmune encephalomyelitis. *J Immunol* 177: 566-73.
- 354 30) Matusevicius, D., P Kivisäkk, B He, N Kostulas, V Ozenci, S Fredrikson, and H Link.  
355 1999. Interleukin-17 mRNA expression in blood and CSF mononuclear cells is  
356 augmented in multiple sclerosis. *Mult Scler* 5: 101-4.
- 357 31) Jadidi-Niaragh, F., and A Mirshafiey. 2011. Th17 cell, the new player of  
358 neuroinflammatory process in multiple sclerosis. *Scand J Immunol* 74: 1-13.
- 359 32) Lock, C., G. Hermans, R. Pedotti, A. Brendolan, E. Schadt, H. Garren, A. Langer-Gould,  
360 S. Strober, B. Cannella, J. Allard, P. Klonowski, A. Austin, N. Lad, N. Kaminski, S. J.  
361 Galli, J. R. Oksenberg, C. S. Raine, R. Heller, and L. Steinman. 2002. Gene-microarray  
362 analysis of multiple sclerosis lesions yields new targets validated in autoimmune  
363 encephalomyelitis. *Nat Med* 8: 500-508.
- 364 33) Vaknin-Dembinsky, A., K. Balashov, and H. L. Weiner. 2006. IL-23 is increased in  
365 dendritic cells in multiple sclerosis and downregulation of IL-23 by antisense oligos  
366 increases dendritic cell IL-10 production. *J. Immunol.* 176: 7768-7774.
- 367 34) Pierson, E. R., C. A. Wagner, and J. M. Goverman. 2018. The contribution of neutrophils  
368 to CNS autoimmunity. *Clin Immunol.* 2018; 189: 23-28.
- 369 35) Nakano, K., K. Yamaoka, K. Hanami, K. Saito, Y. Sasaguri, N. Yanagihara, S. Tanaka, I.  
370 Katsuki, S. Matsushita, and Y. Tanaka. Dopamine induces IL-6-dependent IL-17  
371 production via D1-like receptor on CD4 naive T Cells and D1-like receptor antagonist



- 372 SCH-23390 inhibits cartilage destruction in a human rheumatoid arthritis/SCID mouse  
373 chimera model. *J. Immunol* 186: 3745-3752.
- 374 36) Nakagome, K., M. Imamura, H. Okada, K. Kawahata, T. Inoue, K. Hashimoto, H. Harada,  
375 T. Higashi, R. Takagi, K. Nakano, K. Hagiwara, M. Kanazawa, M. Dohi, M. Nagata, and  
376 S. Matsushita. 2011. Dopamine D1-like receptor antagonist attenuates Th17-mediated  
377 immune response and OVA-Ag-induced neutrophilic airway inflammation. *J. Immunol*  
378 186: 5975-5982.
- 379 37) Arreola, R., Alvarez-Herrera, S., Perez-Sanchez, G., Becerril-Villanueva, E.,  
380 Cruz-Fuentes, C., Flores-Gutierrez, E.O., Garces-Alvarez, M. E., de la Cruz-Aguilera,  
381 D.L., Medina-Rivero, E., Hurtado-Alvarado, G., Quintero-Fabian, S., Pavon, L. 2016.  
382 Immunomodulatory Effects Mediated by Dopamine. *J. Immunol. Res* 2016:3160486.
- 383 38) Tokano, M., S. Matsushita, R. Takagi, T. Yamamoto, and M. Kawano. 2021. Extracellular  
384 adenosine induces hypersecretion of IL-17A by T-helper 17 cells through the adenosine  
385 A2a receptor to promote neutrophilic inflammation. *bioRxiv* 441713; doi:  
386 <https://doi.org/10.1101/2021.04.29.441713>
- 387 39) Takagi, R., M. Kawano, T. Sato, and S. Matsushita. 2021. Tannic acid, a dopamine  
388 receptor agonist, ameliorates periodontitis, atopic dermatitis and psoriasis in animal  
389 models. *Current Trends Immunol* 22:11-17.
- 390 40) Malki, K. E., S.H. Karbach, J. Huppert, M. Zayoud, S. Reissig, R. Schüler, A. Nikolaev,  
391 K. Karram, T. Münzel, C. R. W. Kuhlmann, H. J. Luhmann, E. V. Stebut, S. Wörtge, F. C.  
392 Kurschus, and A. Waisman. 2013. An alternative pathway of imiquimod-induced  
393 psoriasis-like skin inflammation in the absence of interleukin-17 receptor signaling. *J*  
394 *Invest Dermatol* 133:441-451.
- 395 41) Fitts, L.F., S. Mourits, J. S. A. Voerman, M. Kant, L. Boon, J. D. Laman, F. Cornelissen, A.  
396 Mus, E. Florencia, E. P. Prens, and E. Lubberts. 2009. Imiquimod-induced psoriasis-like

397 skin inflammation in mice is mediated via the IL-23/IL-17 axis. *J Immunol*  
398 182:5836-5845.

399 42) Moos, S., A. N. Mohebiany, A. Waisman, and F. C. Kurschus. 2019. Imiquimod-induced  
400 psoriasis in mice depends on the IL-17 signaling of keratinocytes. *J Invest Dermatol*  
401 139:1110-1117.

402 43) Douwes, J., P. Gibson, J. Pekkanen, and N. Pearce. 2002. Non-eosinophilic asthma:  
403 importance and possible mechanisms. *Thorax* 57: 643-648.

404 44) Holgate, S. T., and R. Polosa. 2006. The mechanisms, diagnosis, and management of  
405 severe asthma in adults. *Lancet* 368: 780-793.

406 45) Barczyk, A., W. Pierzchala, and E. Sozańska. 2003. Interleukin-17 in sputum correlates  
407 with airway hyperresponsiveness to methacholine. *Respir. Med* 97: 726-733.

408 46) Al-Ramli W., D. Préfontaine, F. Chouiali, J. G. Martin, R. Olivenstein, C. Lemièrre, and Q.  
409 Hamid. 2009. T(H)17-associated cytokines (IL-17A and IL-17F) in severe asthma. *J.*  
410 *Allergy Clin. Immunol* 123: 1185-1187.

411 47) Bullone, M., V. Carriero, F. Bertolini, A. Folino, A. Mannelli, A. D. Stefano, I. Gnemmi,  
412 R. Torchio, and F. L. M. Ricciardolo. 2019. Elevated serum IgE, oral corticosteroid  
413 dependence and IL-17/22 expression in highly neutrophilic asthma. *Eur Respir J* 54:  
414 1900068.

415 48) Knott, P. G., P. R. Gater, and C. P. Bertrand. 2000. Airway inflammation driven by  
416 antigen-specific resident lung CD4(+) T cells in alpha-beta-T cell receptor transgenic mice.  
417 *Am J Respir Crit Care Med* 161: 1340-1348

418 49) Wilder, J. A., D. D. Collie, D. E. Bice, Y. Tesfaigzi, C. R. Lyons, and M. F. Lipscomb.  
419 2001. Ovalbumin aerosols induce airway hyperreactivity in naïve DO11.10 T cell  
420 receptor transgenic mice without pulmonary eosinophilia or OVA-specific antibody. *J*  
421 *Leukoc Biol* 69: 538-47.

- 422 50) Nakae, S., H. Suto, G. J. Berry, S.J. Galli. 2007. Mast cell-derived TNF can promote  
423 Th17 cell-dependent neutrophil recruitment in ovalbumin-challenged OTII mice. *Blood*  
424 109: 3640-8.
- 425 51) Middleton, E. A., X. He, F. Denorme, R. A. Campbell, D. Ng, S. P. Salvatore, M.  
426 Mostyka, A. Baxter-Stoltzfus, A. C. Borczuk, M. Loda, M. J. Cody, B. K. Manne, I.  
427 Portier, E. S. Harris, A. C. Petrey, E. J. Beswick, A.F. Caulin, A. Iovino, L. M. Abegglen,  
428 A.S. Weyrich, M. T. Rondina, M. Egeblad, J. D. Schiffman, and C. C. Yost. 2020.  
429 Neutrophil extracellular traps contribute to immunothrombosis in COVID-19 acute  
430 respiratory distress syndrome. *Blood* 136:1169-1179
- 431 52) Parackova, Z., I. Zentsova, M. Bloomfield, P. Vrabцова, J. Smetanova, A. Klocperk, G.  
432 Mesežnikov, L. F. C. Mendez, T. Vymazal, and A. Sediva. 2020. Disharmonic  
433 inflammatory signatures in COVID-19: Augmented neutrophils' but impaired monocytes'  
434 and dendritic cells' responsiveness. *Cells* 9:2206.
- 435 53) Tomar, B., H. Anders, J. Desai, and S. R. Mulay. 2020. Neutrophils and neutrophil  
436 extracellular traps drive necroinflammation in COVID-19. *Cells* 9(6):1383.
- 437 54) Sahebnasagh, A., F. Saghafi, M. Safdari, M. Khataminia, A. Sadremomtaz, Z. Talaei, H.  
438 R. Ghaleno, M. Bagheri, S. Habtemariam, and R. Avan. 2020. Neutrophil elastase  
439 inhibitor (sivelestat) may be a promising therapeutic option for management of acute lung  
440 injury/acute respiratory distress syndrome or disseminated intravascular coagulation in  
441 COVID-19. *J Clin Pharm Ther* 45:1515-1519.
- 442 55) Parackova, Z., M. Bloomfield, A. Klocperk, and A. Sediva. 2021. Neutrophils mediate  
443 Th17 promotion in COVID-19 patients. *J Leukoc Biol* 109:73-76.
- 444 56) Pacha, O., M. A. Sallman, and S. E. Evans. 2020. COVID-19: a case for inhibiting  
445 IL-17? . *Nat Rev Immunol* 20:345-346.
- 446 57) Barnes, B. J., J. M. Adrover, A. Baxter-Stoltzfus, A. Borczuk, J. Cools-Lartigue, J. M.

- 447 Crawford, J. Daßler-Plenker, P. Guerci, C. Huyn, J. S. Knight, M. Loda, M. R. Looney, F.  
448 McAllister, R. Rayes, S. Renaud, S. Rousseau, S. Salvatore, R. E. Schwartz, J. D. Spicer,  
449 C. C. Yost, A. Weber, Y. Zuo, and M. Egeblad. 2020. Targeting potential drivers of  
450 COVID-19: Neutrophil extracellular traps. *J Exp Med* 217:e20200652.
- 451 58) Xu, Z., L. Shi, Y. Wang, J. Zhang, L. Huang, C. Zhang, S. Liu, P. Zhao, H. Liu 1, L. Zhu,  
452 Y. Tai, C. Bai, T. Gao, J. Song, P. Xia, J. Dong, J. Zhao, and F. Wang . 2020. Pathological  
453 findings of COVID-19 associated with acute respiratory distress syndrome. *Lancet Respir*  
454 *Med* 8:420-422
- 455 59) Uyemura, K., M. Yamamura, D. F. Fivenson, R. L. Modlin, and B. J. Nickoloff. 1993.  
456 The cytokine network in lesional and lesion-free psoriatic skin is characterized by a  
457 T-helper type 1 cell-mediated response. *J. Invest. Dermatol.* 101: 701-705.
- 458 60) Brembilla, N. C., L. Senra, and W. Boehncke. 2018. The IL-17 family of cytokines in  
459 psoriasis: IL-17A and beyond. *Front Immunol* 9:1682.
- 460 61) Tang, C., S. Chen, H. Qian, W. Huang. 2012. Interleukin-23: as a drug target for  
461 autoimmune inflammatory diseases. *Immunology* 135:112-124.
- 462 62) Boutet MA, A. Nerviani, G. G. Afflitto, and C. Pitzalis. 2018. Role of the IL-23/IL-17  
463 axis in psoriasis and psoriatic arthritis: The clinical importance of its divergence in skin  
464 and joints. *Int J Mol Sci* 19:530.
- 465 63) Lai, Y., D. Li, C. Li, B. Muehleisen, K. A. Radek, H. J. Park, Z. Jiang, Z. Li, H. Lei, Y.  
466 Quan, T. Zhang, Y. Wu, P. Kotol, S. Morizane, T. R Hata, K. Iwatsuki, C Tang, and R. L.  
467 Gallo. 2012. The antimicrobial protein REG3A regulates keratinocyte proliferation and  
468 differentiation after skin injury. *Immunity* 37:74-84.
- 469 64) Alchera, E., S. Rolla, C. Imarisio, V. Bardina, G. Valente, F. Novelli, and R. Carini. 2017.  
470 Adenosine A2a receptor stimulation blocks development of nonalcoholic steatohepatitis  
471 in mice by multilevel inhibition of signals that cause immunolipototoxicity. *Transl Res* 182:

472 75-87.

473 65) Wang, L., H. Wan, W. Tang, Y. Ni, X. Hou, L. Pan, Y. Song, and G. Shi. 2018. Critical

474 roles of adenosine A2A receptor in regulating the balance of Treg/Th17 cells in allergic

475 asthma. *Clin Respir J* 12: 149-157.

476 66) Ansari, M. A., A. Nadeem, S. M. Attia, S. A. Bakheet, M. Raish, and S. F. Ahmad. 2017.

477 Adenosine A2A receptor modulates neuroimmune function through Th17/retinoid-related

478 orphan receptor gamma t (RORgammat) signaling in a BTBR T(+) Itpr3(tf)/J mouse

479 model of autism. *Cell Signal* 36: 14-24.

480 67) Latini, S., and F Pedata. 2001. Adenosine in the central nervous system: release

481 mechanisms and extracellular concentrations. *J Neurochem* 79:463-84

482 68) Engler, R.L. 1991. Adenosine. The signal of life?. *Circulation* 84: 951-954

483

484

#### 485 **Figure legends**

486 Figure 1.

487 An adenosine A2a receptor antagonist, istradefylline, suppresses OVA-induced neutrophilic

488 airway inflammation in DO11.10 mice. (A) The protocol of the OVA-induced neutrophilic

489 airway inflammation assay. (B, C) Lung homogenate was assayed for concentrations of

490 IL-17A by an ELISA (n=7-10). (D) Lung homogenate was assayed for concentrations of

491 IL-17A (left), IFN- $\gamma$  (center), or IL-5 (right) by an ELISA (n=7-10). Data are expressed as the

492 mean  $\pm$  SD and were compared using an unpaired Student's *t*-test. \*P < 0.05 and \*\*P < 0.01,

493 in comparison to the value of water (challenged OVA).

494 Figure 2.

495 Histological findings. Istradefylline suppresses OVA-induced neutrophil and infiltration in

496 DO11.10 mice. Lungs sections from mice administered oral water (A) or istradefylline (B)

497 were stained with hematoxylin and eosin (Scale bar, 50  $\mu$ m).

498 Figure 3.

499 Inhibitor of CD39 (ARL67156) and inhibitor of CD73 (AMP-CP) suppresses OVA-induced  
500 neutrophilic airway inflammation in DO11.10 mice. DO11.10 mice were treated as described  
501 for Fig.1. Lung homogenate was assayed for concentrations of IL-17A by an ELISA (n=7-10).  
502 Data are expressed as the mean  $\pm$  SD and were compared using an unpaired Student's *t*-test.  
503 \*P < 0.05 and \*\*P < 0.01 in comparison to the value of water (challenged OVA).

504 Figure 4.

505 Istradefylline, ARL67156, and AMP-CP suppress IMQ-induced psoriasis in mice. Mice were  
506 treated with either IMQ cream containing 5% IMQ or sham cream and the ear thickness ( $\mu$ m)  
507 was measured. In treatment groups, cream containing 5% istradefylline, liquid containing 10  
508 mM ARL67156, or liquid containing 10 mM AMP-CP inhibitor was used. Data were  
509 obtained from three independent experiments (n = 3-4 mice/group). Data are expressed as the  
510 mean  $\pm$  SD and were compared using an unpaired Student's *t*-test. \*P < 0.05 and \*\*P < 0.01,  
511 in comparison to the value of the non-treatment group.

Fig1

A

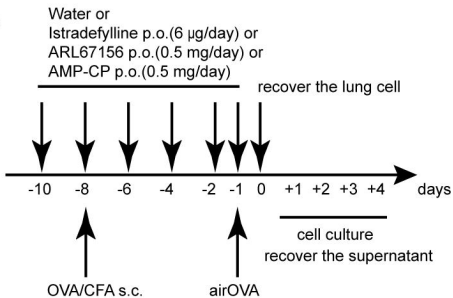

B

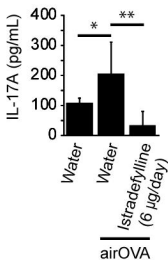

C

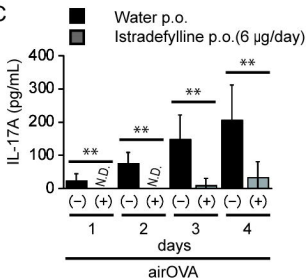

D

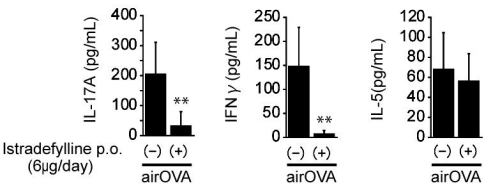

Fig2

A

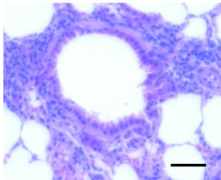

Water

B

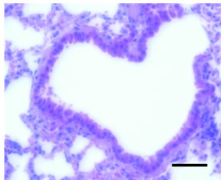

Istradefylline



Fig3

A

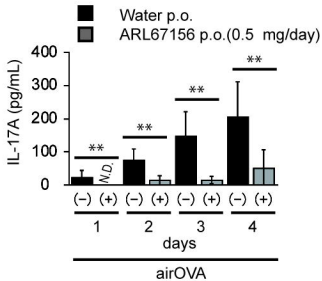

B

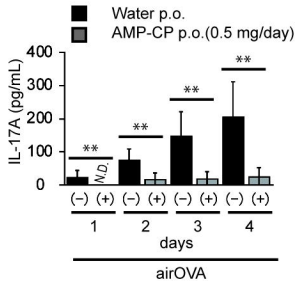

Fig4

A

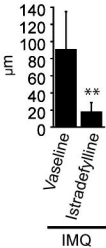

B

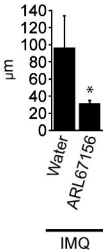

C

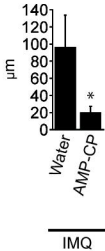

Source: https://biorxiv.org/content/10.1101/2021.05.21.445220v1.full.pdf
